# Supplementary material for: Thematic vent opening probability maps and hazard assessment of small-scale pyroclastic density currents in the San Salvador volcanic complex (El Salvador) and Nejapa-Chiltepe volcanic complex (Nicaragua)
Source: Copernicus journal article supplement (doi:10.5194/nhess-21-1639-2021), 2021-05-28
Supplement: Supplementary file 1 [file nhess-21-1639-2021-supplement.pdf]

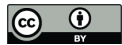

*Supplement of*

**Thematic vent opening probability maps and hazard assessment of small-scale pyroclastic density currents in the San Salvador volcanic complex (El Salvador) and Nejapa-Chiltepe volcanic complex (Nicaragua)**

**Andrea Bevilacqua et al.**

*Correspondence to:* Alvaro Aravena ([alvaro.aravena@uca.fr](mailto:alvaro.aravena@uca.fr))

The copyright of individual parts of the supplement might differ from the article licence.

# San Salvador Volcanic Complex - Ballistics

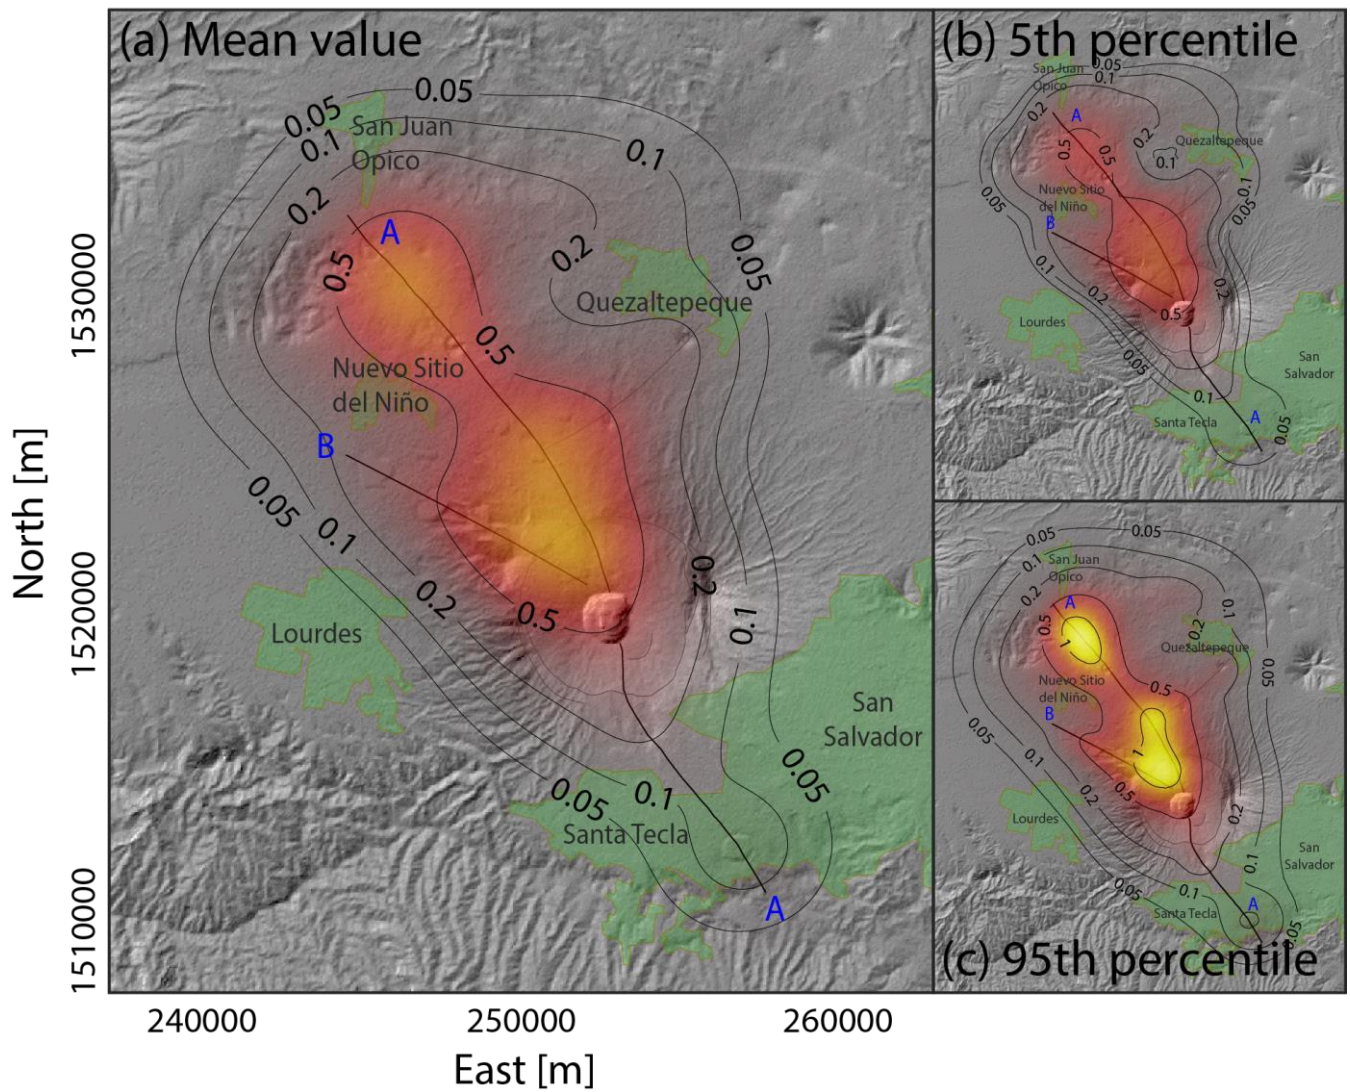

20 **Figure S1:** Density distribution of the probability of vent opening at San Salvador Volcanic Complex, associated with the occurrence of volcanic activity able to produce ballistic fragments. (a) Mean value. (b) 5<sup>th</sup> percentile. (c) 95<sup>th</sup> percentile. Results are expressed in percentage per km<sup>2</sup>.

# San Salvador Volcanic Complex - Low-intensity fallout

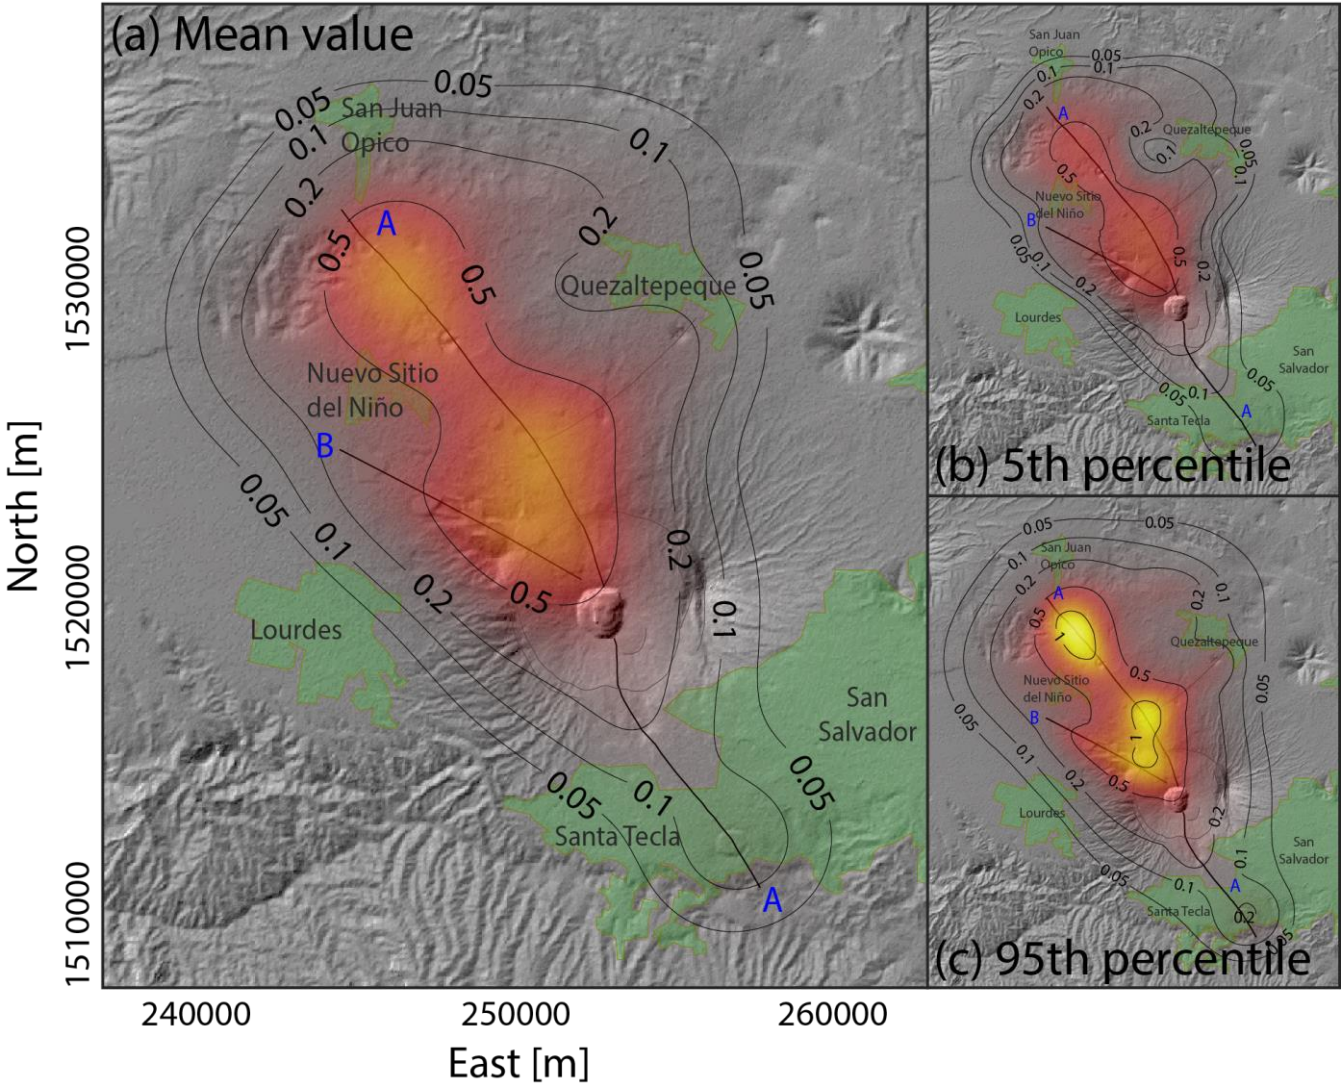

25 **Figure S2:** Density distribution of the probability of vent opening at San Salvador Volcanic Complex, associated with the occurrence of volcanic activity able to produce low-intensity fallout pyroclastic deposits. (a) Mean value. (b) 5<sup>th</sup> percentile. (c) 95<sup>th</sup> percentile. Results are expressed in percentage per km<sup>2</sup>.



# Nejapa-Chiltepe Volcanic Complex - Ballistics

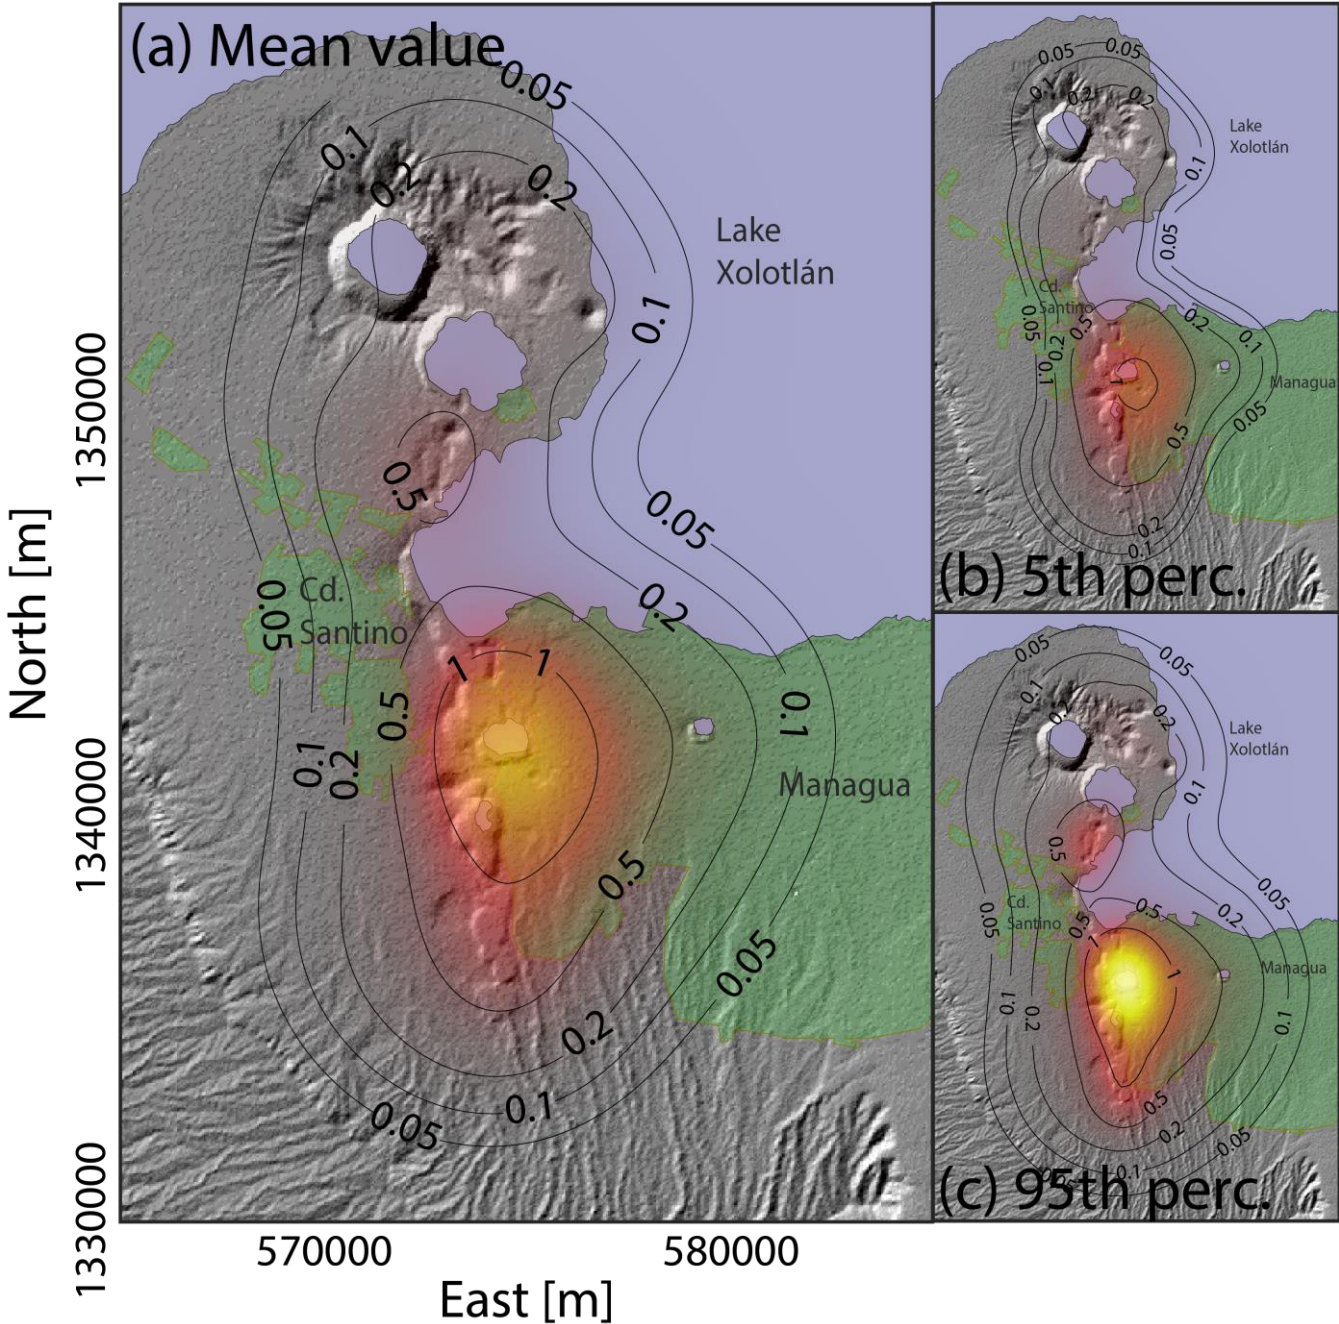

**Figure S3:** Density distribution of the probability of vent opening at Nejapa-Chiltepe Volcanic Complex, associated with the occurrence of volcanic activity able to produce ballistic fragments. (a) Mean value. (b) 5<sup>th</sup> percentile. (c) 95<sup>th</sup> percentile. Results are expressed in percentage per km<sup>2</sup>.

# Nejapa-Chiltepe Volcanic Complex - Low-intensity fallout

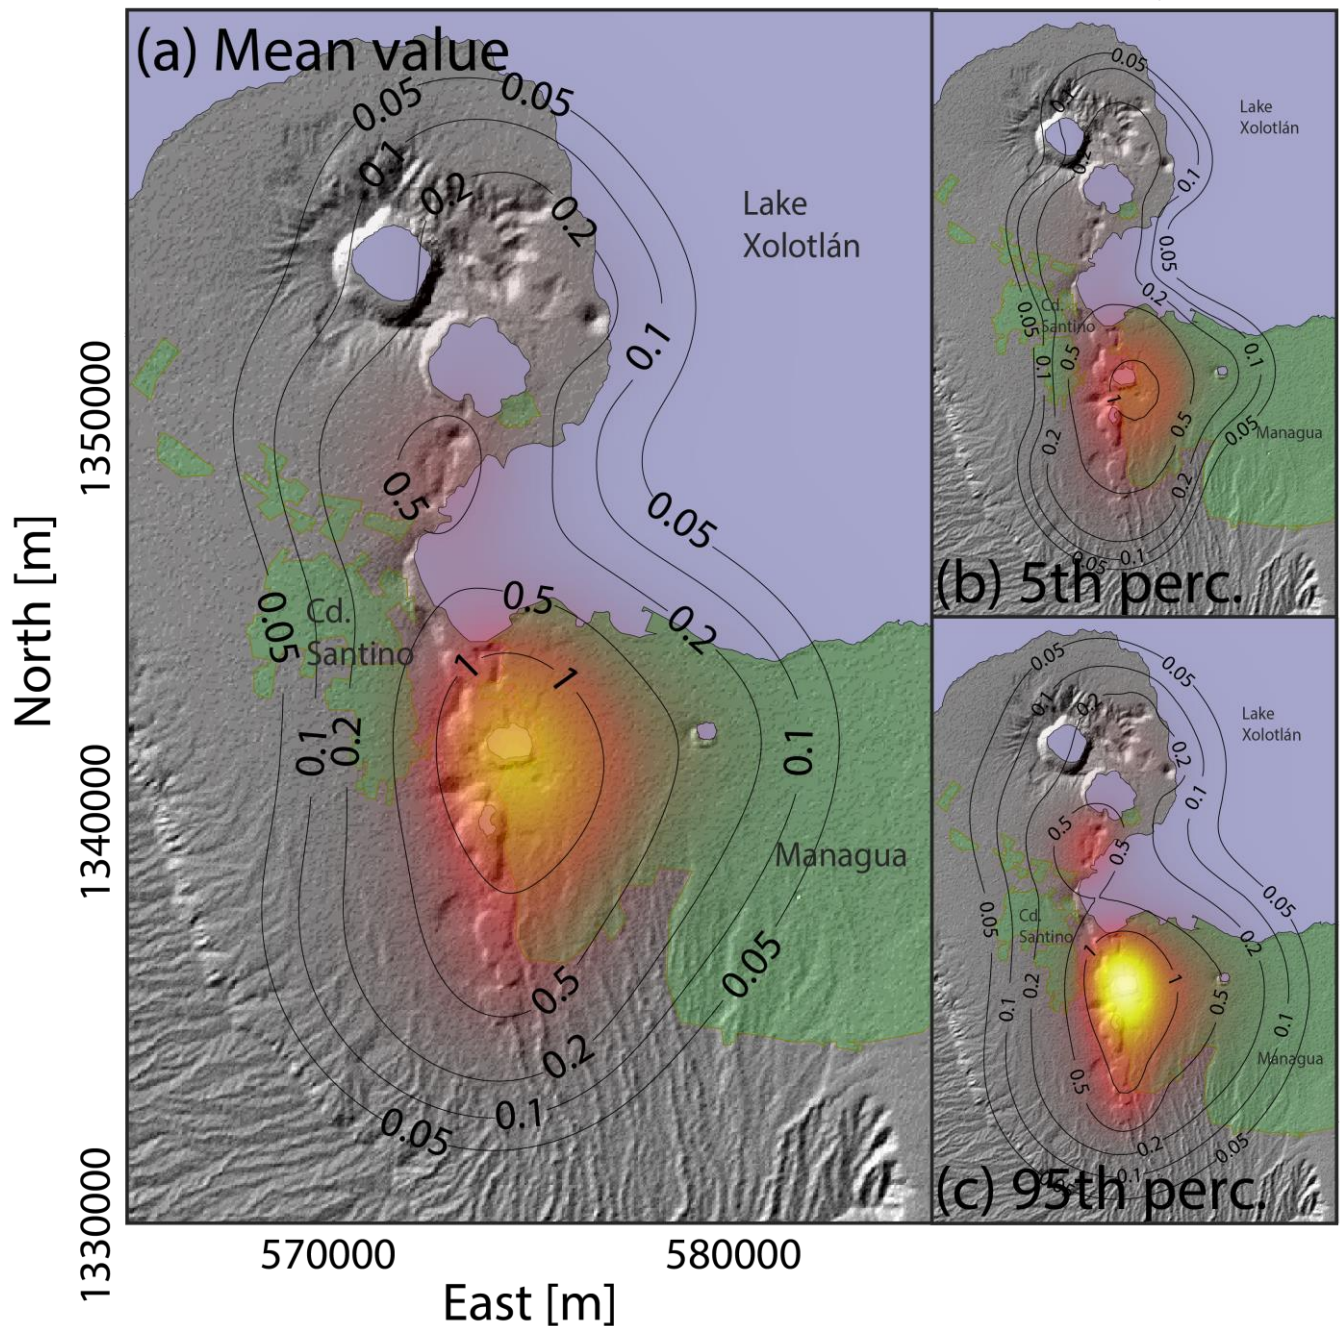

**Figure S4:** Density distribution of the probability of vent opening at Nejapa-Chiltepe Volcanic Complex, associated with the occurrence of volcanic activity able to produce low-intensity fallout pyroclastic deposits. (a) Mean value. (b) 5<sup>th</sup> percentile. (c) 95<sup>th</sup> percentile. Results are expressed in percentage per km<sup>2</sup>.



# San Salvador Volcanic Complex Lava emission (event counting-based approach)

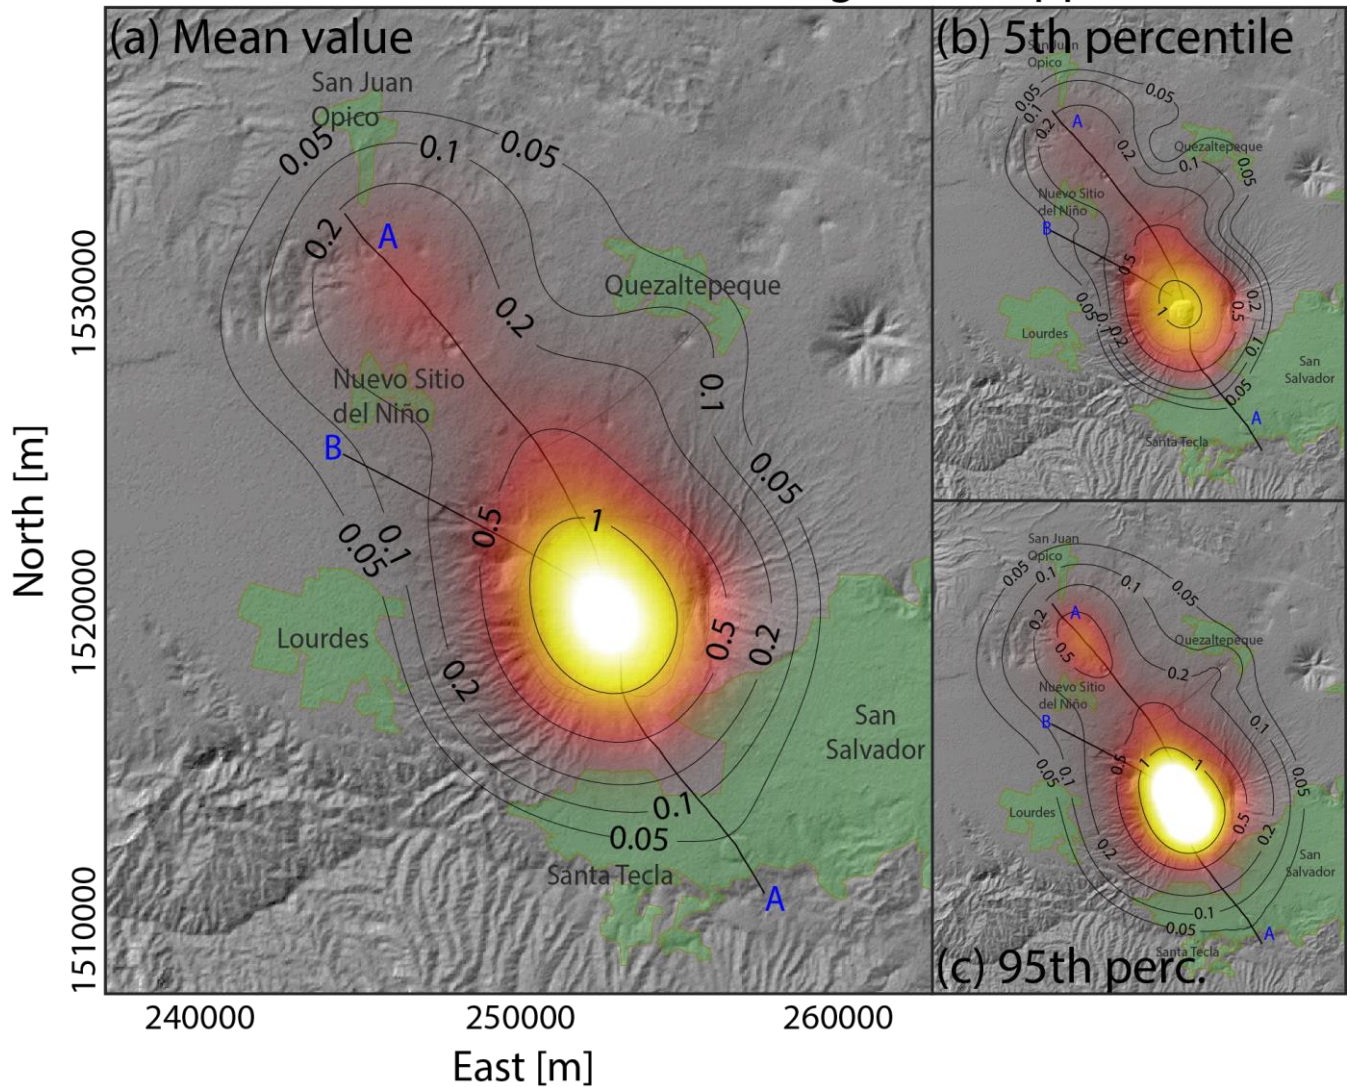

**Figure S5:** Density distribution of the probability of vent opening at San Salvador Volcanic Complex computed using an event counting-based approach (i.e. the polygenetic central vent presents a weight higher than monogenetic vents). These maps are associated with the occurrence of volcanic activity able to produce lava flows. (a) Mean value. (b) 5<sup>th</sup> percentile. (c) 95<sup>th</sup> percentile. Results are expressed in percentage per km<sup>2</sup>.

# San Salvador Volcanic Complex Ballistics (event counting-based approach)

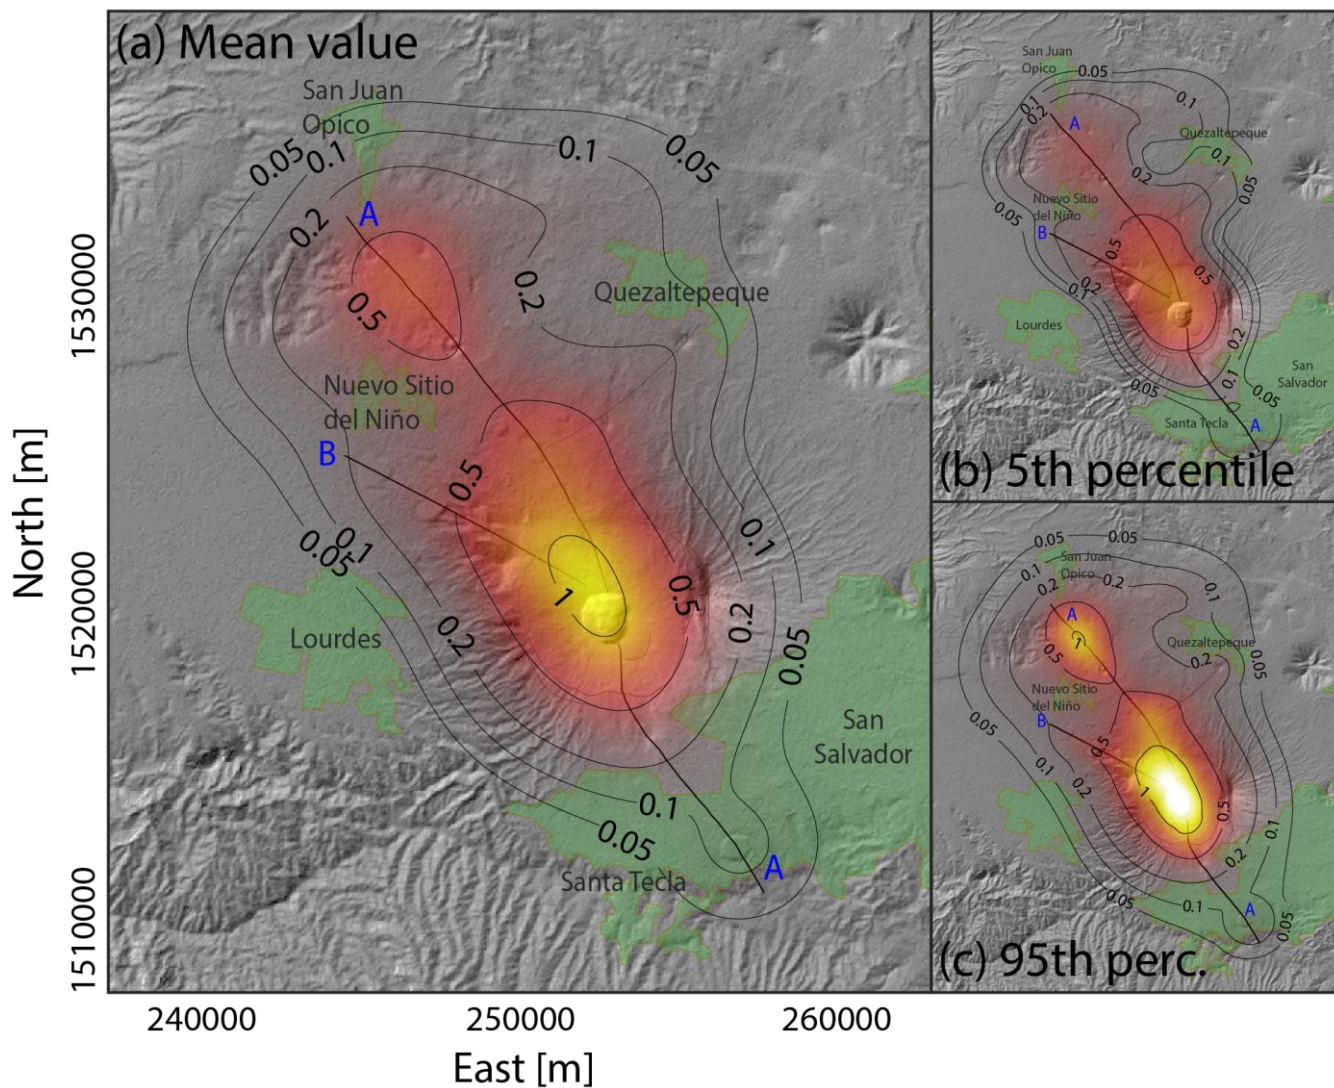

**Figure S6:** Density distribution of the probability of vent opening at San Salvador Volcanic Complex computed using an event counting-based approach (i.e. the polygenetic central vent presents a weight higher than monogenetic vents). These maps are associated with the occurrence of volcanic activity able to produce ballistic fragments. (a) Mean value. (b) 5<sup>th</sup> percentile. (c) 95<sup>th</sup> percentile. Results are expressed in percentage per km<sup>2</sup>.
